# Supplementary material
Source: PubMed Central journal article supplement (PMC4779692)
Supplement: NIHMS751171-supplement-1.pdf [file NIHMS751171-supplement-1.pdf]

**Table S1. Primers or Probe Sequences for PCR, generating constructs, and ChIRP Analysis**

| Primers for real-time PCR                    |                                                                        |                                                                                   |
|----------------------------------------------|------------------------------------------------------------------------|-----------------------------------------------------------------------------------|
|                                              | Sense primer (5'-3')                                                   | Antisense primer (5'-3')                                                          |
| IL-6                                         | CCCAATTTCCAATGCTCTCCT                                                  | CATAACGCACTAGGTTTGCCG                                                             |
| iNOS                                         | GGCAAACCCAAGGTCTACGTT                                                  | GGCCACCAGCTTCTTCAATGT                                                             |
| MIP-2 (CXCL2)                                | CACTCTCAAGGGCGGTCAA                                                    | AGGCATCAGGTACGATCCA                                                               |
| (CCL5) RANTES                                | GAAGGAACCGCCAAGTGTGT                                                   | GAGCAAGCGATGACAGGGAA                                                              |
| Saa3                                         | CATGGAGCAGAGGACTCAAGA                                                  | CAGCATGACTGGGAACAACA                                                              |
| Mybbp1                                       | GGAGACTTGATCCGCCATTT                                                   | GCCAGAAGGTAGGCATGACA                                                              |
| Ptgs2 (Cox-2)                                | GCCAGGCTGAACCTCGAAAC                                                   | ATCCAGGCTGAGCTCACACA                                                              |
| GAPDH                                        | AACAGGGTGGTGGACCTCAT                                                   | AGTTGGGATAGGGCCTCTCTT                                                             |
| U1                                           | ATACTTACTGGGAGGGGAG                                                    | CAGGGGGAAAGCGCGAACGCA                                                             |
| U2                                           | CTGATACGTCTCTATCCGAGG                                                  | TGCAATACCAGGTGCGATGCGT                                                            |
| RPS14                                        | TTCTGGCAAGGAAACCATCTG                                                  | CATCCTGGGCAGCCAACAT                                                               |
| BACE1AS                                      | TCAATGCTAACCTGGCTACG                                                   | TTCCCATCAGGCGCTTACA                                                               |
| H19AS                                        | GGACACCTGACCTCCCTACC                                                   | CAAACCAGCCAGGGGTCTAC                                                              |
| HOTAIR                                       | CTTGAAACCTCTTCGCAGG                                                    | TGTGCGGTGGAGATAGATGTG                                                             |
| xcmch10a                                     | TGTGTTCTGCATGTTCCACA                                                   | CCCACATCAGGGCTAAAGAG                                                              |
| Mistral                                      | GGTCACCAAGGCTTCACTGA                                                   | CCTTGTGTCAAAGCCAGAGAA                                                             |
| NEAT1                                        | GGAGGCCATCGTTGAAGTCA                                                   | CATTCATGCATCCGCAAAGA                                                              |
| SNHG1                                        | ACTTTGGAGCCAGGCTGT                                                     | GACATCATTGCAACTCAGCCAT                                                            |
| SNHG3                                        | TTCCGGGCGTTACTTAAGG                                                    | GGTCAAGAACAAGCACACCAA                                                             |
| NR_015555                                    | TGGAGGACCAGGACTCAAAT                                                   | TCCAGAAATCGGGCTCTTAT                                                              |
| LincRNA-Cox2                                 | AGTATGGGATAACCACTGAGGT                                                 | GAATGCTGAGAGTGGGAGAAATAG                                                          |
| chr1:1756                                    | TGACAGCACACATCAAACCTC                                                  | ACCAGCCCTAGTTTGGTTGA                                                              |
| chr18:3644                                   | TTCAAAGATCAGCCACCAGA                                                   | GGGAAAAGCCACAAATACCA                                                              |
| chr19:1259                                   | GCAAGTGCCATGAGTCTGAA                                                   | ATTTGCCCGATGACTTTCTG                                                              |
| chr2:8443                                    | TAACCTTAGCACTGGCATGA                                                   | GAAAAGGCAAAAGCAGAAAGG                                                             |
| chr16:3452                                   | ACCCCTTCCCATGCTAGAC                                                    | TGGGACTTTTGTGGAATGGT                                                              |
| Primers for Chromatin Immunoprecipitation    |                                                                        |                                                                                   |
| LincRNA-Cox2                                 | TGGTGGGTAGGGTTGTGGA                                                    | TGAACACACTGGGAAACAAGC                                                             |
| IL-6 primer 1 and 2                          | TCCAATCAGCCCCACCCACTC                                                  | GGTGGCTCCAGAGCAGAATG                                                              |
| IL-6 primer 3 and 4                          | GACATGCTCAAGTCTGAGTCAC                                                 | AGATTGCACAATGTGACGTCG                                                             |
| CCL5 primer 3 and 4                          | TGACACAAGTGTGGTCTGTTTCTG                                               | AGGTAGCAGGGAGCTGTTGTCTTA                                                          |
| CCL5 primer 9 and 10                         | TGGAGGGCAGTTAGAGCCAGAG                                                 | AGCCAGGGTAGCAGAGGAAGTG                                                            |
| CCL5 primer 11 and 12                        | CTCTTTTGTCCCATCTTAGTTACTAATG                                           | CATGGAAGAGTATTGTGATGAGCATACC                                                      |
| Saa3 primer 1 and 2                          | CAACCAAGGATGGCGAAGACTTC                                                | AGGAGATGTGGCCGAGGATATC                                                            |
| Saa3 primer 3 and 4                          | GCGCAATCTGGGGAAGA                                                      | AGTGGCTTCTGTCTTTGCTGA                                                             |
| Saa3 primer 5 and 6                          | TGGTCCATTTGCAAACCCCTT                                                  | TGCTTCTGCAGTGCTGAGCTA                                                             |
| Saa3 primer 7 and 8                          | AGGGACCACATAATCAAGGGC                                                  | TTTCACCTACATTCCCCTGGA                                                             |
| Primers for Promoter constructs <sup>a</sup> |                                                                        |                                                                                   |
| LincRNA-Cox2                                 | TacgctgAGGGCCAAGAAGTGGGAGTT (Mlu I)                                    | GctcgagAAGGAGCCTCATATTCCACACCT (Xho I)                                            |
| CCL5                                         | TacgctgACTTGGACCTGCCATCCGTT (Mlu I)                                    | GctcgagTGAGGATGATGGTGGAGGCA (Xho I)                                               |
| Saa3                                         | TacgctgCAACCAGGATGGCGAAGACT (Mlu I)                                    | GctcgagCCAGGAACAGGGAAGAGTGCTA (Xho I)                                             |
| IFN $\beta$                                  | TacgctgGGTCTCATCTTTATCAGTCCCTCAAG (Mlu I)                              | GctcgagGGAGGATCCACCTGTTGTTCAT (Xho I)                                             |
| Primers for 5'- and 3'- RACE PCR             |                                                                        |                                                                                   |
| LincRNA-Cox2                                 | 5'- RACE Gene-specific primer (5'-3')<br>CAGGGCTGGCCAGTAAGTATGGGATAACC | 3'- RACE Gene-specific primer (5'-3')<br>sense primer that used for real-time PCR |
| Primers for LincRNA-Cox2 overexpression      |                                                                        |                                                                                   |
| LincRNA-Cox2                                 | CACggaattTCCCAGGTGTGGAATATGAGG (EcoR I)                                | CCtctagaTTAATGATCATTCTTTCTTTT<br>ATTTTATTGTTGA (Xba I)                            |
| Oligoes for REAA                             |                                                                        |                                                                                   |
| Short 5 recessed Saa3 PstI                   | GCGGTGACCCGGGAGATCTGAATTCtgca                                          |                                                                                   |
| Long Blunt Saa3 PstI                         | GAATTCAGATCTCCCGGGTCACCCG                                              |                                                                                   |
| Saa3 P1b                                     | TGACCCGGGAGATCTGAATTCtgca                                              |                                                                                   |
| Saa3 P2                                      | TGGTCCATTTGCAAACCCCTT                                                  | P1a TGACCCGGGAGATCTGAATTC                                                         |
| Long Blunt CCL5 EcoN I                       | GCGGTGACCCGGGAGATCTGAATTC                                              |                                                                                   |
| Short 3 recessed CCL5 EcoN I                 | aGAATTCAGATCTCCCGGGTCACCCG                                             |                                                                                   |
| CCL5 P1b                                     | TGACCCGGGAGATCTGAATTCtatag                                             | P2 TTTGGCCAGAGAGGGAGTCATC                                                         |
| ChIRP Probes                                 |                                                                        |                                                                                   |
| LincRNA-Cox2-probe 1                         | 5'-CTCATATTCCACACCTGGGA-BIOTEG-3'                                      | -probe 2 5'-ATAACAACCCACTTATTAGG-BIOTEG-3'                                        |
| LincRNA-Cox2-probe 3                         | 5'-CCACTCTTCTTACCCCTTTT-BIOTEG-3'                                      | -probe 4 5'-TTCCTTAGTTCCTTGTGTAG-BIOTEG-3'                                        |
| LincRNA-Cox2-probe 5                         | 5'-TTTCAGGGCTGGCCAGTAAG-BIOTEG-3'                                      | -probe 6 5'-CCTTGCTCTCTTTCAAATTC-BIOTEG-3'                                        |
| LacZ-probe 1                                 | 5'-TTCAGACGGCAAACGACTGT-BIOTEG-3'                                      | -probe 2 5'-TGATGCTCGTGACGGTAAAC-BIOTEG-3'                                        |
| LacZ-probe 3                                 | 5'-TCAGTTGCTGTTGACTGTAG-BIOTEG-3'                                      | -probe 4 5'-CCAGTGAATCCGTAATCATG-BIOTEG-3'                                        |
| LacZ-probe 5                                 | 5'-AATGTGAGCGAGTAACAACC-BIOTEG-3'                                      | -probe 6 5'-GTAGCCAGCTTTTCATCAACA-BIOTEG-3'                                       |

Listed in this table are all the primers used in this study for the real-time PCR and RACE PCR, as well as those for ChIP analysis and construct generating, and probes for ChIRP analysis. <sup>a</sup>Restriction enzyme sites were indicated by lowercase letters.

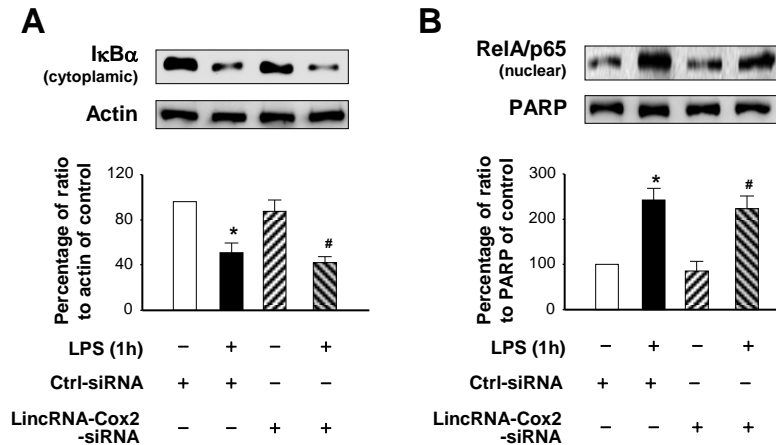

**Figure S1. LincRNA-Cox2 siRNA Did not Show a Significant Effect on the Cytoplasmic Degradation of IkB $\alpha$  and Nuclear Importing of NF- $\kappa$ B p65 Induced by LPS.** RAW264.7 cells were transfected with the lincRNA-Cox2-siRNA for 24h followed by LPS stimulation for up to 1h. Cytoplasmic and nuclear extracts were obtained and blotted for IkB $\alpha$  and p65, respectively. Actin and PARP were used as loading controls. Representative blots from three independent experiments are shown.

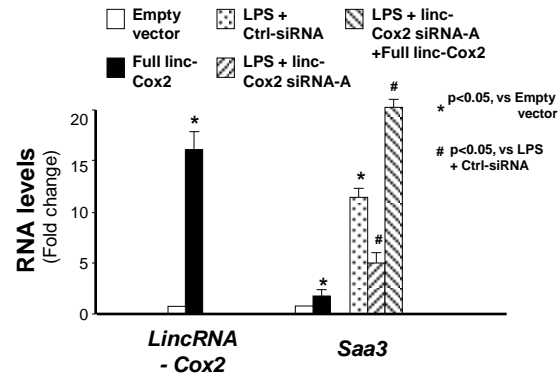

**Figure S2. Overexpression of LincRNA-Cox2 Attenuated the Inhibitory Effects of LincRNA-Cox2 siRNA on LPS-induced Upregulation of Saa3 Gene in RAW264.7 Cells.** Cells were transfected with the full-length of lincRNA-Cox2 or siRNA-A to lincRNA-Cox2 for 24h, exposed to LPS stimulation for 4h and followed by real-time PCR analysis of Saa3.

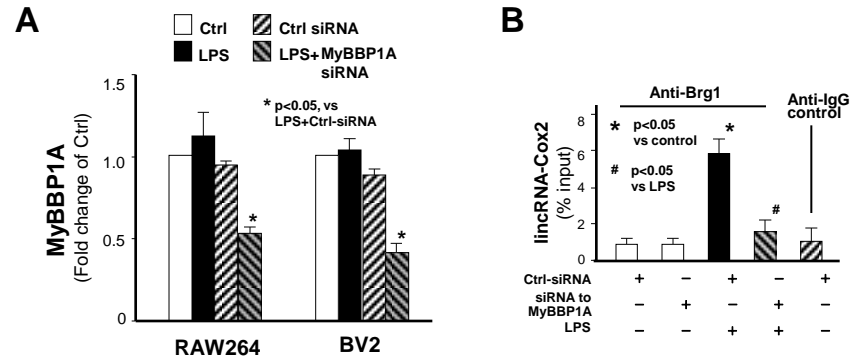

**Figure S3. siRNA Knockdown of MyBBP1A and its Impact on LincRNA-Cox2 Assembly to the SWI/SNF Complex.** (A) Quantitative PCR analysis of MyBBP1A in RAW264.7 and BV2 cells treated by a specific siRNA to MyBBP1A. (B) Knockdown of MyBBP1A attenuated the assembly of lincRNA-Cox2 to SWI/SNF complex. RAW264.7 cells were transfected with an siRNA to MyBBP1A for 24h, exposed to LPS (for 2h), and cell extracts were used for RIP analysis of lincRNA-Cox2 using anti-Brg1.
